# Supplementary material for: Prevention of TGF-β-induced early liver fibrosis by a maleic acid derivative anti-oxidant through suppression of ROS, inflammation and hepatic stellate cells activation
Source: PubMed Central journal article supplement (PMC5383026; doi:10.1371/journal.pone.0174008), 2017-04-06

國立成功大學  
實驗動物照護與使用委員會審查同意書  
Affidavit of Approval of Animal Use Protocol  
National Cheng Kung University

同意書編號(IACUC Approval No) : 930155

計畫主持人: 莊佳璋 職 稱: 助理教授

單 位: 急診學科 飼養地點: 成大動物中心

實驗地點: 成大動物中心

計畫名稱: 建立抗肝臟纖維化活性成分的篩選平台

本「動物實驗計畫書」業經實驗動物照護與使用委員會  實質  形式審查通過。本計畫預定飼養應用之動物如下：

| 動物種類(品系) | 動物總數/計畫年數 | 飼養及應用期間(西元)          |
|----------|-----------|----------------------|
| C57BC/6  | 100       | 2004/11/1~2005/10/31 |

The animal use protocol listed below has been reviewed and approved by the Institutional Animal Care and Use Committee (IACUC).

Protocol Title: Prevention of TGF-induced early liver fibrosis by a maleic acid derivative anti-oxidant through suppression of ROS, inflammation and hepatic stellate cells activation

IACUC Approval No : 930155

Period of Protocol: Valid From: 11/1/2004 To: 10/31/2005

Principle Investigator (PI): Chuang-Chia Chang

實驗動物照護與使用委員會召集人 張俊彥 日期: 106. 3. 07 【Re-submitted】

IACUC Chairman: Chuang-Chia Chang Date: 106. 3. 07 【Re-submitted】

(重要文件，請勿遺失)

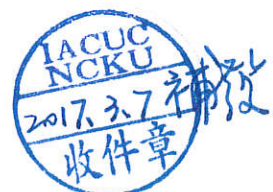

Supplement: pone.0174008.s001.pdf [file pone.0174008.s001.pdf]
